# Supplementary material for: What Is a 2021 Reference Body?
Source: MDPI journal article supplement (doi:10.3390/nu14071526), 2022-04-06
Supplement: s1 [file s1]

**Supplement: Table S1.** Characteristics of the adults used in developing the manifold regression equations.

|                                 | Male             |                  |                  | Female            |                   |
|---------------------------------|------------------|------------------|------------------|-------------------|-------------------|
|                                 | <40              | ≥40              | Total            | <40               | ≥40               |
| <b>N (%)</b>                    | 115 (44.6)       | 143 (55.4)       | 258 (45.3)       | 121 (38.8)        | 191 (61.2)        |
| <b>Ethnicity</b>                |                  |                  |                  |                   |                   |
| Asian                           | 30 (26.1%)       | 29 (20.3%)       | 59 (22.9%)       | 26 (21.5%)        | 42 (22.0%)        |
| Black                           | 20 (17.4%)       | 35 (24.5%)       | 55 (21.3%)       | 22 (18.2%)        | 45 (23.6%)        |
| Hispanic                        | 20 (17.4%)       | 10 (7.0%)        | 30 (11.6%)       | 23 (19.0%)        | 21 (11.0%)        |
| NHOPI                           | 11 (9.6%)        | 4 (2.8%)         | 15 (5.8%)        | 13 (10.7%)        | 11 (5.8%)         |
| White                           | 34 (29.6%)       | 65 (45.5%)       | 99 (38.4%)       | 37 (30.6%)        | 72 (37.7%)        |
| <b>Age (years)</b>              |                  |                  |                  |                   |                   |
| Mean (SD)                       | 28.7 (6.20)      | 55.9 (10.0)      | 43.8 (16.0)      | 28.7 (5.97)       | 56.6 (9.02)       |
| Median [range]                  | 29.0 [18,39]     | 57.0 [40,79]     | 42.5 [18.0-79.0] | 29.0 [18,39]      | 58.0 [40,75]      |
| <b>Height (cm)</b>              |                  |                  |                  |                   |                   |
| Mean (SD)                       | 176 (7.74)       | 176 (7.49)       | 176 (7.59)       | 163 (7.22)        | 162 (6.80)        |
| Median [range]                  | 176 [155,202]    | 176 [151,190]    | 176 [151-202]    | 163 [146,181]     | 162 [144,181]     |
| <b>Weight (kg)</b>              |                  |                  |                  |                   |                   |
| Mean (SD)                       | 85.1 (19.3)      | 88.8 (21.1)      | 87.2 (20.4)      | 73.4 (22.1)       | 70.9 (19.3)       |
| Median [range]                  | 84.9 [41.5,174]  | 82.5 [40.6,149]  | 83.8 [40.6-174]  | 68.6 [38.6,153]   | 68.6 [35.4,146]   |
| <b>BMI (kg/m<sup>2</sup>)</b>   |                  |                  |                  |                   |                   |
| Mean (SD)                       | 27.5 (5.68)      | 28.7 (5.98)      | 28.1 (5.86)      | 27.8 (8.22)       | 26.9 (6.88)       |
| Median [range]                  | 27.1 [17.0,49.2] | 27.8 [18.2,52.6] | 27.4 [17.0-52.6] | 26.5 [14.8, 51.9] | 26.4 [14.2, 53.1] |
| <b>Waist Circumference (cm)</b> |                  |                  |                  |                   |                   |
| Mean (SD)                       | 91.2 (14.3)      | 99.2 (16.0)      | 95.6 (15.7)      | 90.9 (18.1)       | 92.5 (15.4)       |
| Median [range]                  | 90.1 [59.4, 133] | 96.6 [47.4, 157] | 93.8 [47.4-157]  | 87.3 [64.4, 148]  | 90.4 [60.5, 157]  |

BMI, body mass index; NHOPI, Native Hawaii or other Pacific Islanders
